# Supplementary material for: Spreading out spin density in polyphenalenyl radicals
Source: Royal Society of Chemistry journal article supplement (doi:10.1039/c7cp04930g), 2017-01-01
Supplement: c7cp04930g1.pdf [file c7cp04930g1.pdf]

## Spreading out spin density in polyphenalenyl radicals

Georges Trinquier and Jean-Paul Malrieu

Laboratoire de Chimie et Physique Quantiques (CNRS-UMR5626), IRSAMC, Université  
Paul-Sabatier (Toulouse III), 31062 Toulouse Cedex, France

### Supplementary Information

- I. Breaking down of  $\pi$  spin density per phenalene unit along L15 (Figure S1).
- II. Plot of  $\pi$  spin densities in S10 and S'10 systems (Figure S2), with atom labeling defined in Figure S3.
- III. List of optimized CC bond lengths in neutral and ionized P19 (Table S1), with bond labeling defined in Figure S4, and further ranking and visualization in Figure S5.
- IV. Selected harmonic vibrational frequencies in **8** (Figure S6).

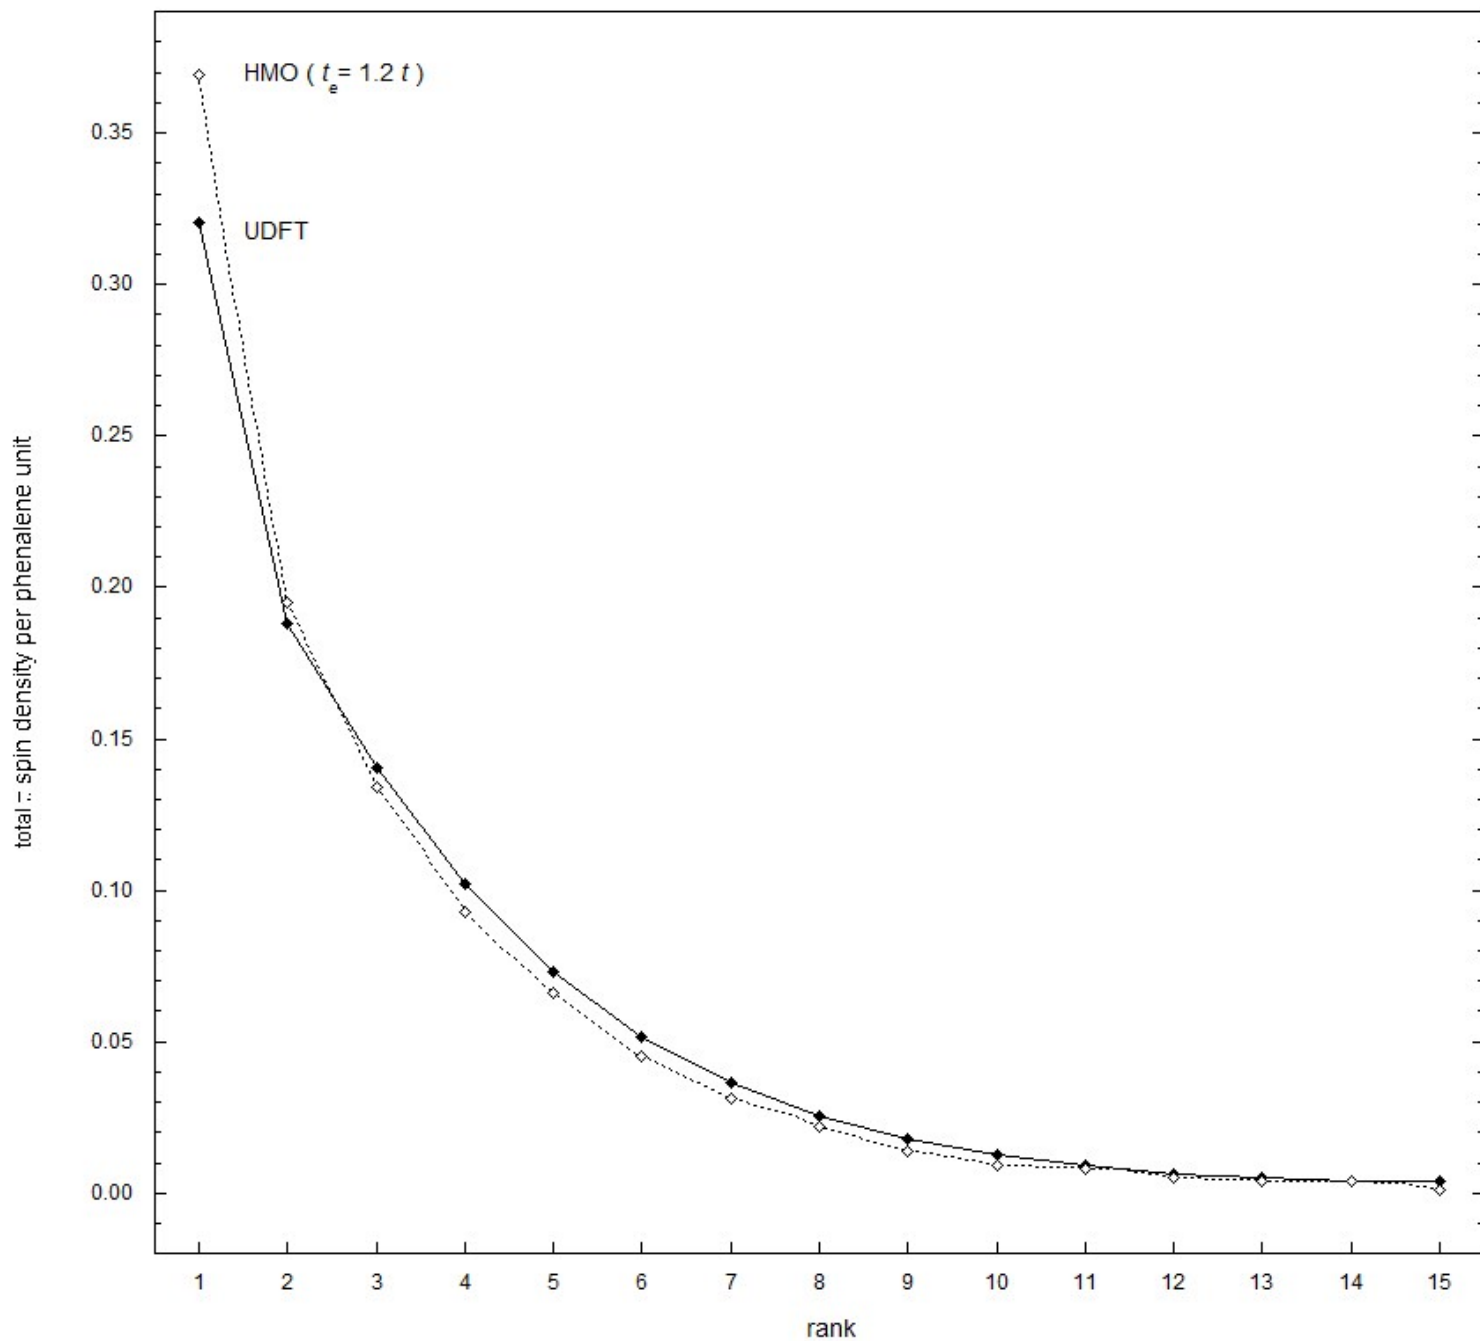

**Figure S1.**  $\pi$  spin density per phenalene unit in L15. Comparison between UDFT values (solid line) and Hückel SOMO results, using  $t_e=1.2 t$  for the shorter exterior bonds (dashed line).

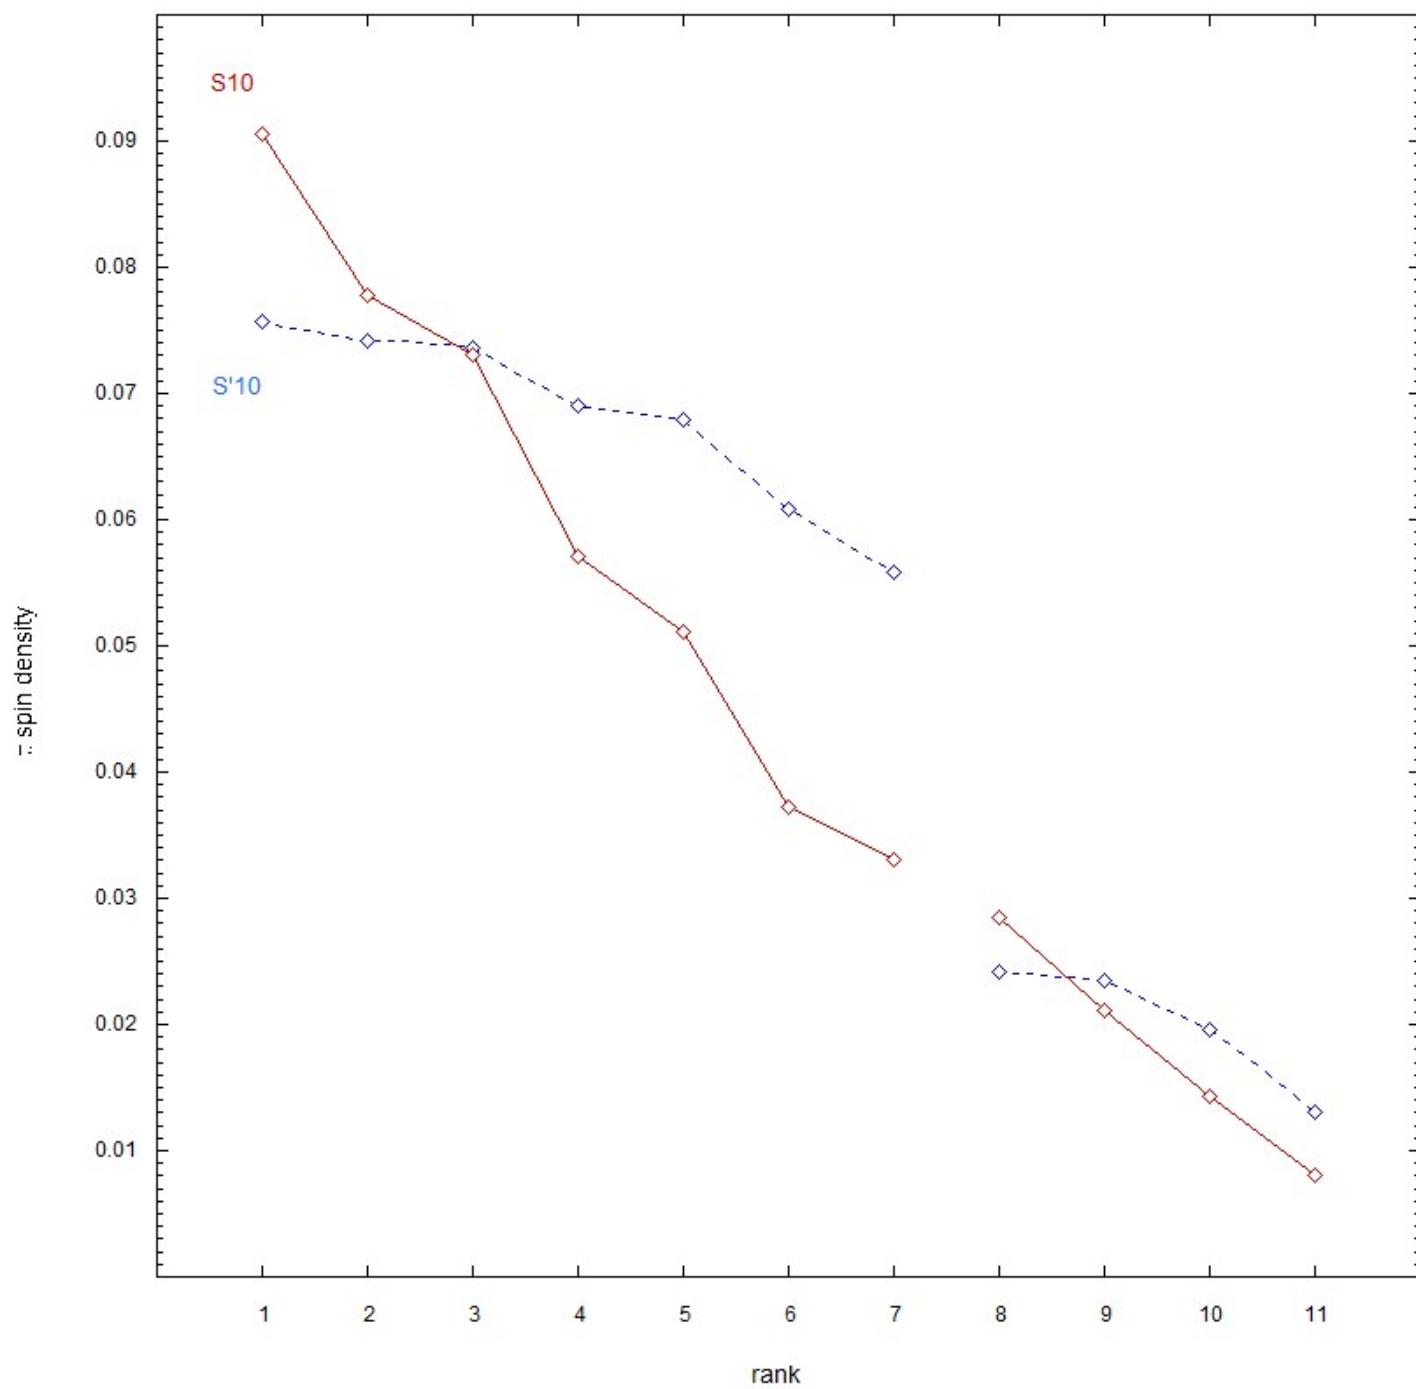

**Figure S2.** Ranked  $\pi$  spin densities on major conjugated sites in S10 and S'10 systems.

See labeling in Figure S3.

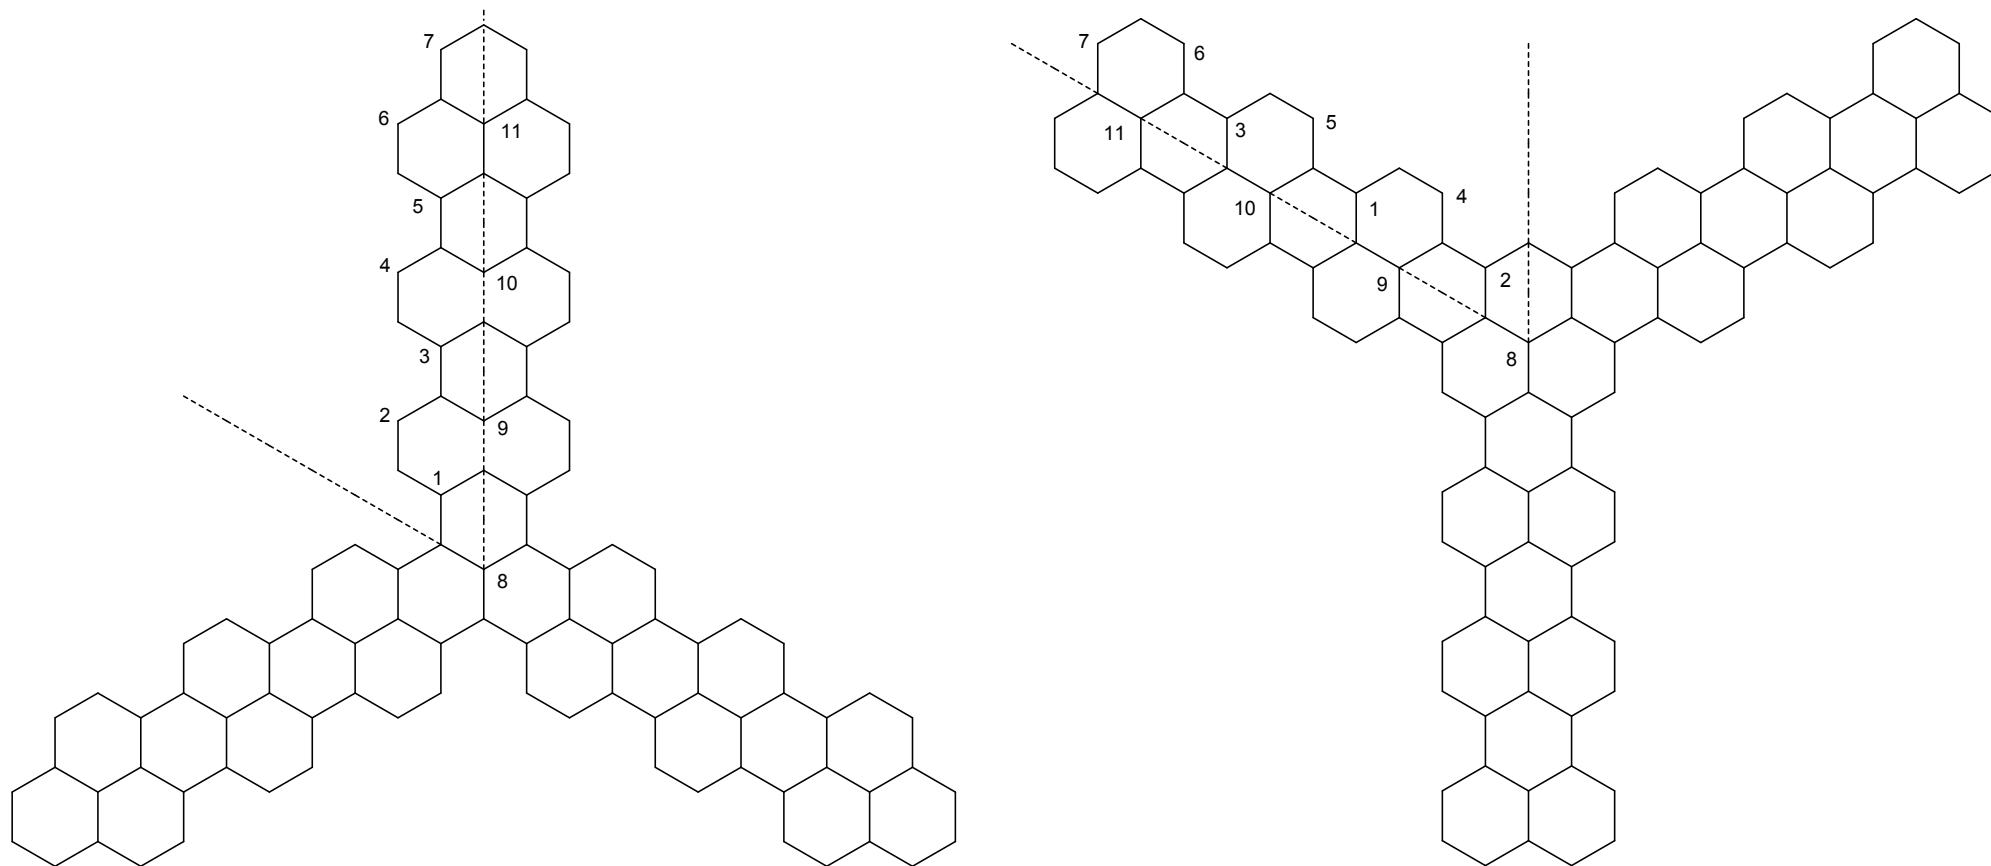

**Figure S3.** Labeling of major-spin sites in S10 (left) and S'10 (right). Like S4, to ensure planarity, the actual molecular system for S10 includes three additional non-conjugated  $\text{-CH}_2\text{-}$  bridges.

**Table S1.** Calculated CC bond lengths (Å) in P19. <sup>a</sup>

|    | radical | cation | anion |
|----|---------|--------|-------|
| a  | 1.425   | 1.424  | 1.426 |
| b  | 1.422   | 1.421  | 1.423 |
| c  | 1.420   | 1.419  | 1.421 |
| d  | 1.428   | 1.427  | 1.427 |
| e  | 1.433   | 1.432  | 1.432 |
| f  | 1.425   | 1.424  | 1.424 |
| g  | 1.420   | 1.420  | 1.420 |
| h  | 1.423   | 1.422  | 1.424 |
| i  | 1.419   | 1.418  | 1.420 |
| j  | 1.436   | 1.435  | 1.435 |
| k  | 1.408   | 1.408  | 1.408 |
| l  | 1.423   | 1.422  | 1.425 |
| m  | 1.429   | 1.428  | 1.430 |
| n  | 1.437   | 1.436  | 1.439 |
| o  | 1.425   | 1.425  | 1.425 |
| p  | 1.421   | 1.422  | 1.422 |
| q  | 1.403   | 1.402  | 1.403 |
| r  | 1.421   | 1.421  | 1.421 |
| s  | 1.415   | 1.415  | 1.415 |
| t  | 1.432   | 1.431  | 1.433 |
| u  | 1.426   | 1.426  | 1.426 |
| v  | 1.410   | 1.409  | 1.410 |
| w  | 1.414   | 1.415  | 1.415 |
| x  | 1.414   | 1.414  | 1.414 |
| y  | 1.426   | 1.425  | 1.428 |
| z  | 1.426   | 1.425  | 1.427 |
| aa | 1.423   | 1.423  | 1.423 |
| bb | 1.417   | 1.417  | 1.417 |
| cc | 1.365   | 1.365  | 1.365 |
| dd | 1.431   | 1.431  | 1.431 |
| ee | 1.440   | 1.440  | 1.440 |
| ff | 1.429   | 1.428  | 1.430 |
| gg | 1.421   | 1.421  | 1.421 |
| hh | 1.367   | 1.367  | 1.367 |
| ii | 1.449   | 1.449  | 1.449 |
| jj | 1.385   | 1.385  | 1.385 |

<sup>a</sup> See Figure S4 for labeling.

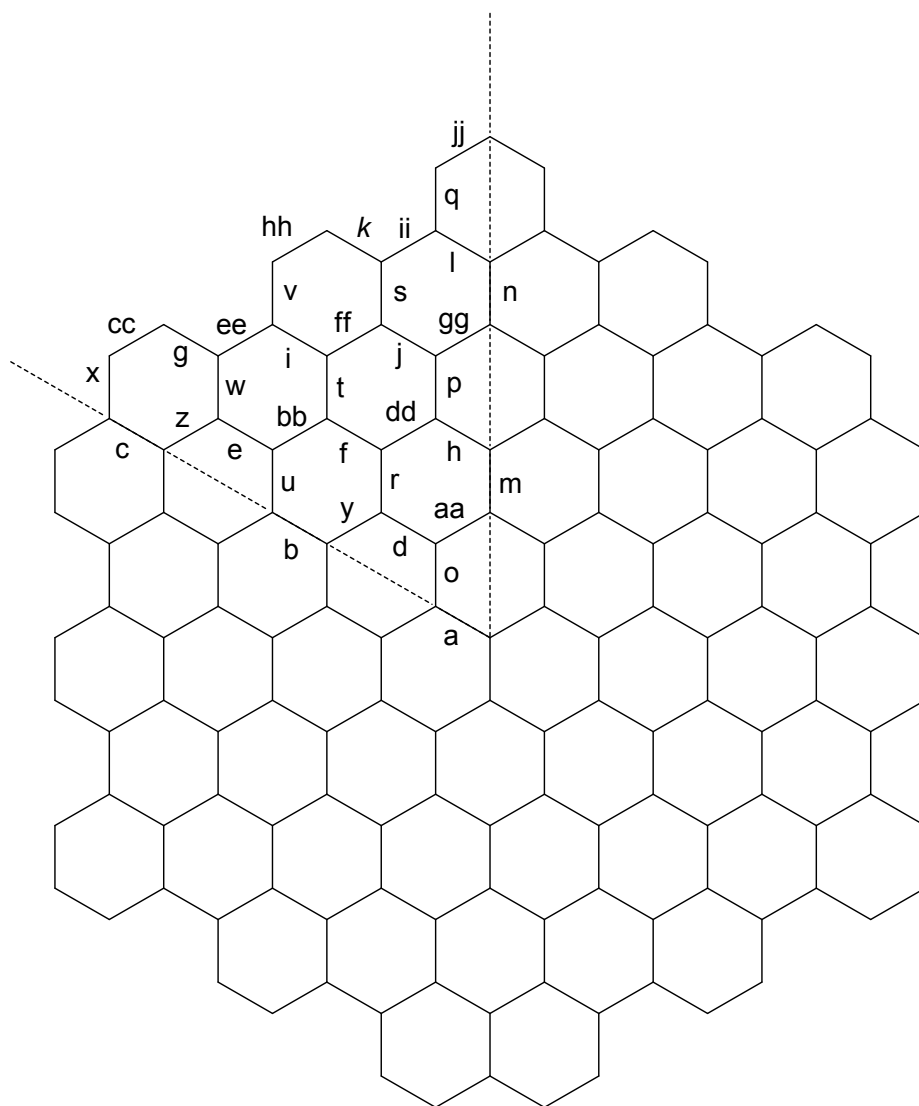

**Figure S4.** Bond-length labeling for Table S1.

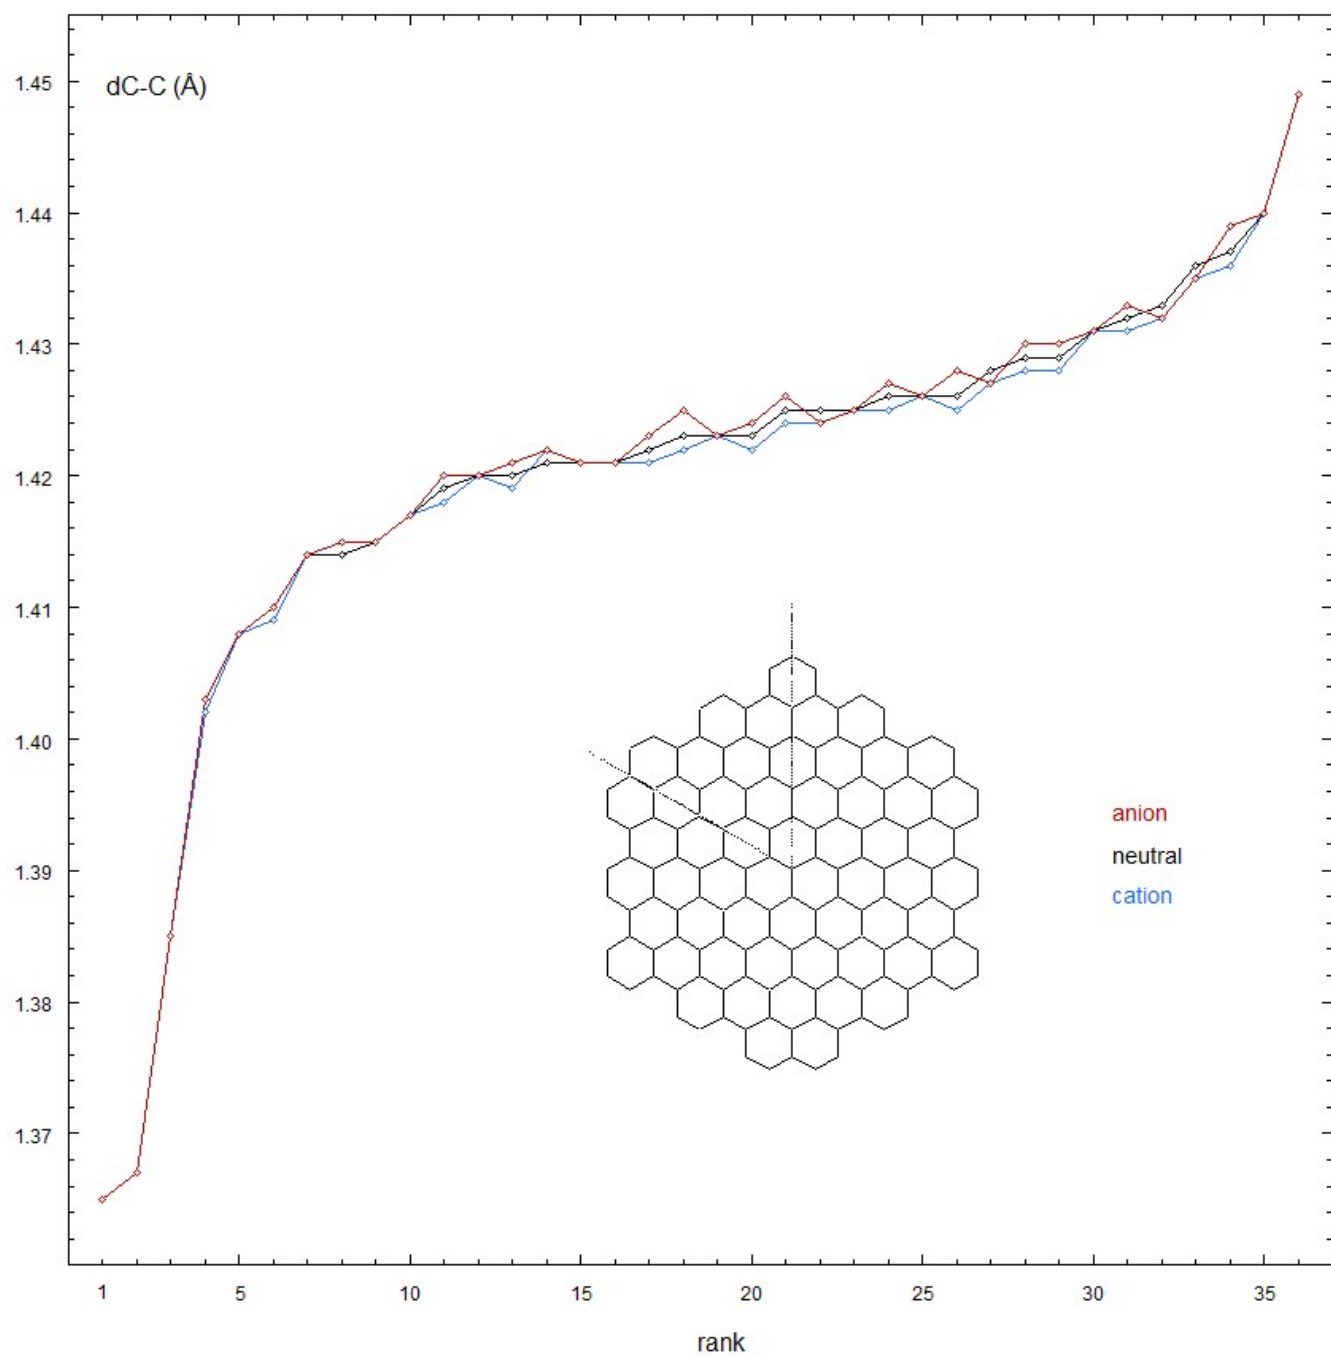

**Figure S5.** Ranking and comparing the CC bond lengths of Table S1.

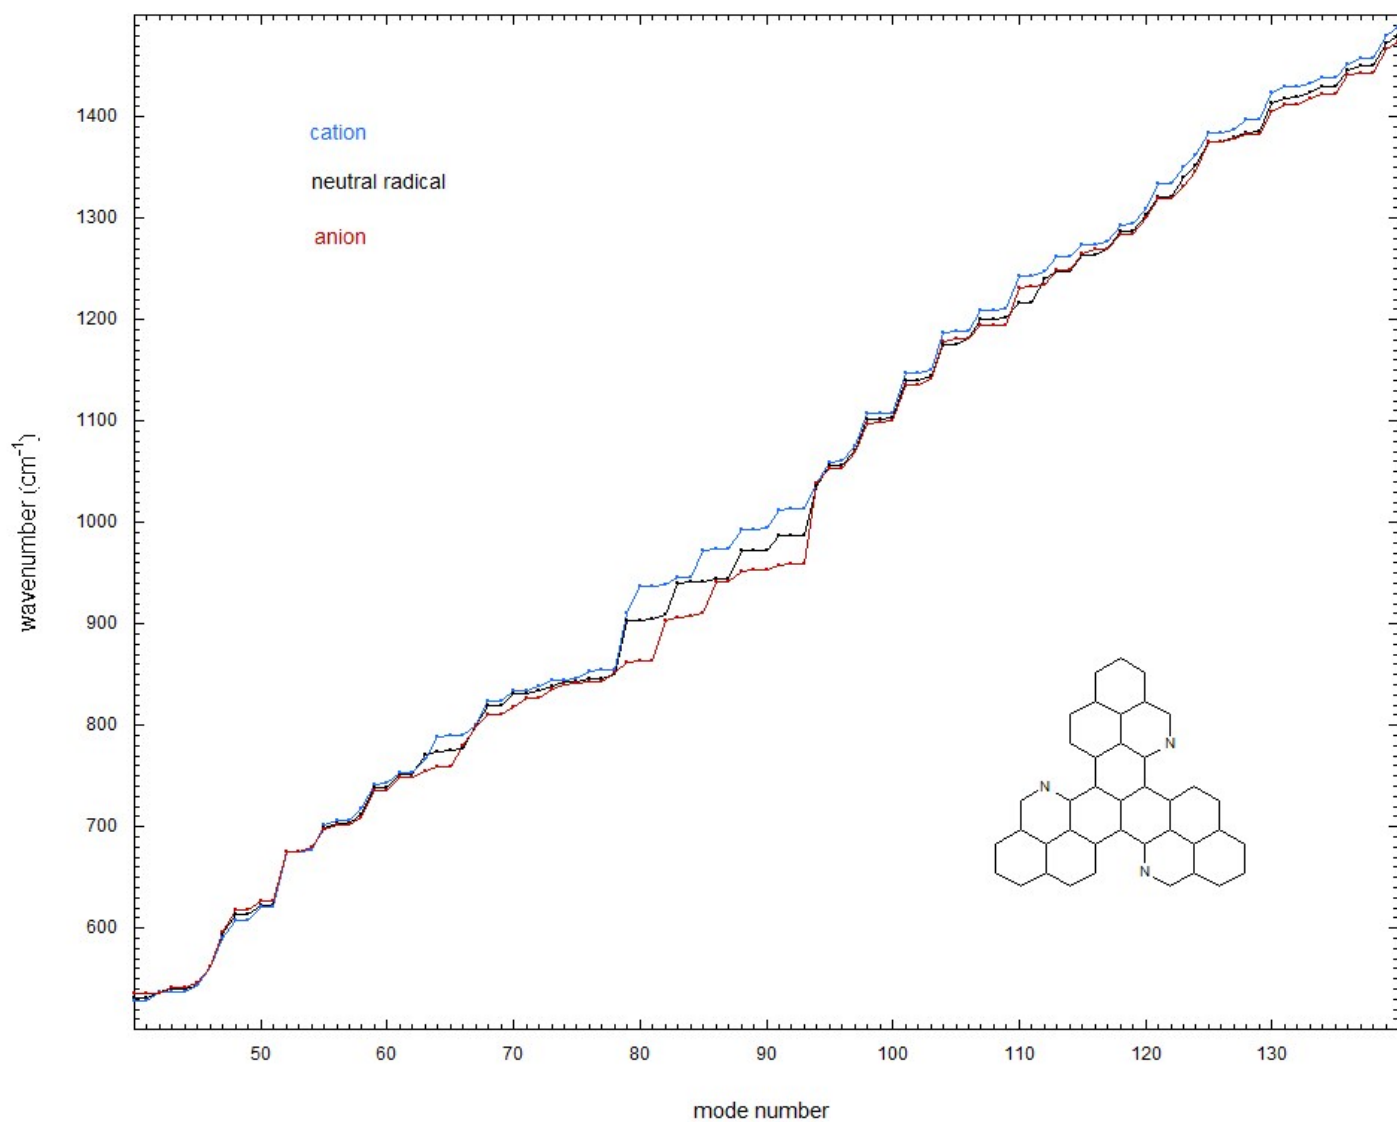

**Figure S6.** Some harmonic vibrational frequencies for  $C_{40}H_{18}N_3$ , a non-planar variant of S4 in neutral (black), cationic (blue) and anionic (red) states.
